# Supplementary material for: The diversity and biogeography of the Coleoptera of Churchill: insights from DNA barcoding
Source: PubMed Central journal article supplement (PMC3819705; doi:10.1186/1472-6785-13-40), 2013-10-29
Supplement: 1472-6785-13-40-S4.pdf [file 1472-6785-13-40-S4.pdf]

**Additional File 6.** Genetic distances within and between 283 species or provisional species of Coleoptera of Churchill, based upon the 2972 specimens having barcode sequences of at least 500 bp. “N/A” for the maximum intraspecific distance indicates a sample size of just one specimen of sequence length of at least 500 bp for that species. Additional species or provisional species only represented by sequences of <500 bp occur in the list of specimens (Additional file 1).

| Family        | Species or Provisional Species    | Maximum Intraspecific Distance | Nearest Neighbour Distance |
|---------------|-----------------------------------|--------------------------------|----------------------------|
| Brachyceridae | <i>Grypus</i> CHU1                | N/A                            | 28.06                      |
| Buprestidae   | <i>Chrysobothris trinervia</i>    | 1.4                            | 12.9                       |
| Buprestidae   | <i>Melanophila acuminata</i>      | N/A                            | 17.62                      |
| Buprestidae   | <i>Phaenops drummondi</i>         | N/A                            | 15.38                      |
| Byrrhidae     | ByrrhidaeTW CHU2                  | N/A                            | 18.6                       |
| Byrrhidae     | <i>Byrrhus</i> CHU2               | N/A                            | 2.8                        |
| Byrrhidae     | <i>Byrrhus fasciatus</i>          | 0                              | 2.8                        |
| Byrrhidae     | <i>Simplocaria metallica</i> CHU1 | 0.61                           | 2.49                       |
| Byrrhidae     | <i>Simplocaria metallica</i> CHU2 | N/A                            | 2.49                       |
| Cantharidae   | <i>Podabrus</i> CHU1              | 0.46                           | 3.28                       |
| Cantharidae   | <i>Podabrus</i> CHU2              | 0                              | 3.13                       |
| Cantharidae   | <i>Podabrus</i> CHU3              | 0                              | 6.53                       |
| Cantharidae   | <i>Podabrus</i> CHU4              | 0.16                           | 4.23                       |
| Cantharidae   | <i>Podabrus</i> CHU5              | 0.15                           | 3.13                       |
| Cantharidae   | <i>Rhagonycha</i> CHU1            | 0.15                           | 12.75                      |
| Carabidae     | <i>Agonum</i> CHU1                | 0.16                           | 8.34                       |
| Carabidae     | <i>Agonum affine</i>              | N/A                            | 9.85                       |
| Carabidae     | <i>Agonum nigriceps</i>           | N/A                            | 8.76                       |
| Carabidae     | <i>Agonum placidum</i>            | N/A                            | 8.76                       |
| Carabidae     | <i>Amara</i> CHU1                 | N/A                            | 9.04                       |
| Carabidae     | <i>Amara alpina</i>               | 0.17                           | 1.19                       |
| Carabidae     | <i>Amara glacialis</i>            | N/A                            | 11.78                      |
| Carabidae     | <i>Amara hyperborea</i>           | 0                              | 8.01                       |
| Carabidae     | <i>Amara pseudobrunnea</i>        | N/A                            | 4.4                        |
| Carabidae     | <i>Amara quenseli</i>             | 0.49                           | 10.33                      |
| Carabidae     | <i>Amara sinuosa</i>              | 2.13                           | 4.4                        |
| Carabidae     | <i>Amara torrida</i>              | 0                              | 1.19                       |
| Carabidae     | <i>Bembidion</i> CHU1             | N/A                            | 12.72                      |
| Carabidae     | <i>Bembidion carinula</i>         | N/A                            | 13.67                      |
| Carabidae     | <i>Bembidion hastii</i>           | 1.02                           | 12.4                       |
| Carabidae     | <i>Bembidion morulum</i>          | 0.18                           | 12.4                       |
| Carabidae     | <i>Bembidion nigripes</i>         | 0.32                           | 12.58                      |

|               |                                       |      |       |
|---------------|---------------------------------------|------|-------|
| Carabidae     | <i>Bembidion sordidum</i>             | 0.16 | 12.51 |
| Carabidae     | <i>Bembidion transversale</i>         | N/A  | 12.83 |
| Carabidae     | <i>Calathus ingratus</i>              | 0.34 | 12.31 |
| Carabidae     | CarabidaeTW CHU7                      | 0.32 | 12.07 |
| Carabidae     | <i>Carabus chamissonis</i>            | 0.51 | 7.33  |
| Carabidae     | <i>Carabus maender</i>                | 0.16 | 12.69 |
| Carabidae     | <i>Carabus taedatus agassii</i>       | 1.56 | 7.33  |
| Carabidae     | <i>Cicindela longilabris</i>          | 0    | 15.68 |
| Carabidae     | <i>Cymindis cribricollis</i>          | 0    | 5.04  |
| Carabidae     | <i>Cymindis unicolor</i> CHU1         | 1.62 | 4.62  |
| Carabidae     | <i>Cymindis unicolor</i> CHU2         | N/A  | 4.62  |
| Carabidae     | <i>Diacheila arctica</i>              | N/A  | 10.96 |
| Carabidae     | <i>Dicheirotichus cognatus</i>        | N/A  | 4.57  |
| Carabidae     | <i>Dicheirotichus mannerheimii</i>    | N/A  | 4.57  |
| Carabidae     | <i>Dyschiriodes integer</i>           | N/A  | 7.95  |
| Carabidae     | <i>Dyschirius hiemalis</i>            | 0.32 | 7.95  |
| Carabidae     | <i>Elaphrus americanus americanus</i> | 1.39 | 12.01 |
| Carabidae     | <i>Elaphrus clairvillei</i>           | 0.3  | 7.01  |
| Carabidae     | <i>Elaphrus lapponicus</i>            | 0.35 | 7.01  |
| Carabidae     | <i>Harpalus</i> CHU1                  | 0.2  | 5.57  |
| Carabidae     | <i>Harpalus nigritarsis</i>           | 0.46 | 5.57  |
| Carabidae     | <i>Loricera pilicornis</i>            | 0    | 14.2  |
| Carabidae     | <i>Notiophilus aquaticus</i>          | 0.78 | 7.67  |
| Carabidae     | <i>Notiophilus borealis</i>           | 0.77 | 7.67  |
| Carabidae     | <i>Patrobus foveocollis</i>           | 1.7  | 12.39 |
| Carabidae     | <i>Patrobus stygicus</i>              | 0.46 | 12.39 |
| Carabidae     | <i>Pelophila borealis</i>             | N/A  | 12.88 |
| Carabidae     | <i>Platynus mannerheimii</i>          | 0.49 | 7.91  |
| Carabidae     | <i>Pterostichus adstrictus</i>        | 0.31 | 8.59  |
| Carabidae     | <i>Pterostichus brevicornis</i>       |      |       |
| Carabidae     | <i>brevicornis</i>                    | 0.32 | 5.97  |
| Carabidae     | <i>Pterostichus caribou</i>           | 2.36 | 3.86  |
| Carabidae     | <i>Pterostichus pinguedineus</i>      | 0    | 3.86  |
| Carabidae     | <i>Pterostichus punctatissimus</i>    | 1.15 | 6.77  |
| Carabidae     | <i>Stereocerus haematopus</i>         | 0.66 | 9.62  |
| Carabidae     | <i>Trechus apicalis</i>               | 0    | 11.62 |
| Cerambycidae  | <i>Acmaeops proteus</i>               | N/A  | 9.63  |
| Cerambycidae  | <i>Arhopalus foveicollis</i>          | 0.92 | 14.19 |
| Cerambycidae  | <i>Gnathacmaeops pratensis</i>        | 0.31 | 9.63  |
| Cerambycidae  | <i>Monochamus scutellatus</i>         | 1.08 | 14.19 |
| Cerambycidae  | <i>Xestoleptura tibialis</i>          | N/A  | 16.91 |
| Chrysomelidae | <i>Altica tombacina</i>               | 2.4  | 17.22 |
| Chrysomelidae | <i>Bromius</i> CHU1                   | N/A  | 2.82  |

|                |                                   |      |       |
|----------------|-----------------------------------|------|-------|
| Chrysomelidae  | <i>Bromius obscurus</i>           | N/A  | 2.82  |
| Chrysomelidae  | <i>Chaetocnema</i> CHU1           | N/A  | 17.01 |
| Chrysomelidae  | <i>Galerucella nymphaeae</i>      | 0.16 | 11.64 |
| Chrysomelidae  | <i>Gonioctena linnaeana</i>       | 0.61 | 18.34 |
| Chrysomelidae  | <i>Phaedon</i> CHU2               | N/A  | 18.53 |
| Chrysomelidae  | <i>Plateumaris</i> CHU1           | 1.57 | 16.88 |
| Chrysomelidae  | <i>Tricholochmaea</i> CHU1        | N/A  | 11.64 |
| Cleridae       | CleridaeTW CHU1                   | N/A  | 14.49 |
| Coccinellidae  | <i>Adalia bipunctata</i>          | 2.27 | 15.18 |
| Coccinellidae  | <i>Anisosticta bitriangularis</i> | 0.78 | 15.3  |
| Coccinellidae  | <i>Calvia quatuordecimguttata</i> | N/A  | 12.6  |
| Coccinellidae  | <i>Coccinella</i> CHU1            | N/A  | 12.6  |
| Coccinellidae  | <i>Coccinella septempunctata</i>  | 0.62 | 13.69 |
| Coccinellidae  | <i>Didion</i> CHU1                | 0.15 | 15.11 |
| Coccinellidae  | <i>Hippodamia</i> CHU1            | 0.31 | 2.17  |
| Coccinellidae  | <i>Hippodamia</i> CHU2            | 0.62 | 2.17  |
| Coccinellidae  | <i>Hippodamia convergens</i>      | 0    | 15.54 |
| Coccinellidae  | <i>Hyperaspis</i> CHU1            | 1.7  | 3.76  |
| Coccinellidae  | <i>Hyperaspis</i> CHU2            | 0    | 3.76  |
| Coccinellidae  | <i>Mulsantina hudsonica</i>       | N/A  | 14.06 |
| Cryptophagidae | <i>Atomaria</i> CHU1              | 0.77 | 8.48  |
| Cryptophagidae | <i>Atomaria</i> CHU2              | 2.01 | 8.48  |
| Cryptophagidae | CryptophagidaeTW CHU1             | N/A  | 15.53 |
| Cryptophagidae | CryptophagidaeTW CHU2             | 0.16 | 15.53 |
| Cryptophagidae | CryptophagidaeTW CHU5             | N/A  | 17.83 |
| Cryptophagidae | <i>Cryptophagus</i> CHU1          | N/A  | 15.79 |
| Cucujidae      | <i>Pediacus fuscus</i>            | N/A  | 16.61 |
| Curculionidae  | <i>Acalyptus carpinii</i>         | 0.46 | 18.51 |
| Curculionidae  | <i>Anthonomus signatus</i>        | N/A  | 20.09 |
| Curculionidae  | <i>Auleutes epilobii</i>          | N/A  | 17.6  |
| Curculionidae  | <i>Elleschus ehippiatus</i> CHU1  | 0.47 | 2.43  |
| Curculionidae  | <i>Elleschus ehippiatus</i> CHU2  | N/A  | 2.43  |
| Curculionidae  | <i>Euhrychiopsis lecontei</i>     | 0.6  | 17.6  |
| Curculionidae  | <i>Hypera</i> CHU1                | 0.46 | 10.99 |
| Curculionidae  | <i>Hypera seriata</i>             | N/A  | 10.99 |
| Curculionidae  | <i>Lepyrus labradorensis</i>      | N/A  | 10.25 |
| Curculionidae  | <i>Lepyrus stefanssoni</i>        | 0.16 | 10.25 |
| Curculionidae  | <i>Orchestes</i> CHU1             | N/A  | 17.82 |
| Curculionidae  | <i>Polygraphus rufipennis</i>     | 0.31 | 20.57 |
| Dytiscidae     | <i>Acilius canaliculatus</i>      | 0    | 11.67 |
| Dytiscidae     | <i>Agabus</i> CHU1                | N/A  | 10.75 |
| Dytiscidae     | <i>Agabus adpressus</i>           | N/A  | 11.56 |
| Dytiscidae     | <i>Agabus ajax</i>                | 0.46 | 7.8   |

|            |                                   |      |       |
|------------|-----------------------------------|------|-------|
| Dytiscidae | <i>Agabus antennatus</i> CHU1     | 0.33 | 5.96  |
| Dytiscidae | <i>Agabus antennatus</i> CHU2     | 0    | 8.92  |
| Dytiscidae | <i>Agabus arcticus</i>            | 1.57 | 9.63  |
| Dytiscidae | <i>Agabus audeni</i>              | 1.71 | 3.12  |
| Dytiscidae | <i>Agabus bicolor</i>             | 0.92 | 8.63  |
| Dytiscidae | <i>Agabus bifarius</i> CHU1       | N/A  | 2.39  |
| Dytiscidae | <i>Agabus bifarius</i> CHU2       | N/A  | 2.39  |
| Dytiscidae | <i>Agabus clavicornis</i>         | 0.3  | 2.71  |
| Dytiscidae | <i>Agabus colymbus</i>            | 0.81 | 10.6  |
| Dytiscidae | <i>Agabus infuscatus</i>          | 1.44 | 7.8   |
| Dytiscidae | <i>Agabus phaeopterus</i>         | 2.83 | 1.15  |
| Dytiscidae | <i>Agabus seriatus</i>            | N/A  | 9.86  |
| Dytiscidae | <i>Agabus thomsoni</i>            | 1.08 | 1.15  |
| Dytiscidae | <i>Carrhydrus crassipes</i>       | 0.98 | 2.71  |
| Dytiscidae | <i>Colymbetes dahuricus</i>       | 1.08 | 7.56  |
| Dytiscidae | <i>Colymbetes dolabratus</i>      | 3.76 | 7.56  |
| Dytiscidae | <i>Dytiscus alaskanus</i>         | 1.14 | 3.16  |
| Dytiscidae | <i>Dytiscus dauricus</i>          | 0.62 | 3.16  |
| Dytiscidae | <i>Graphoderus perplexus</i>      | 0.72 | 11.22 |
| Dytiscidae | <i>Hydrocolus rubyae</i>          | N/A  | 11.77 |
| Dytiscidae | <i>Hydroporus</i> CHU4            | 0.46 | 5.38  |
| Dytiscidae | <i>Hydroporus</i> CHU5            | 1.86 | 8.42  |
| Dytiscidae | <i>Hydroporus</i> CHU6            | 1.39 | 5.21  |
| Dytiscidae | <i>Hydroporus columbianus</i>     | 0.62 | 6.79  |
| Dytiscidae | <i>Hydroporus dentellus</i>       | 1.08 | 5.13  |
| Dytiscidae | <i>Hydroporus erythrocephalus</i> | 0.66 | 8.59  |
| Dytiscidae | <i>Hydroporus fuscipennis</i>     | 1.09 | 10.56 |
| Dytiscidae | <i>Hydroporus larsoni</i>         | 0.3  | 5.21  |
| Dytiscidae | <i>Hydroporus morio</i>           | 3.46 | 6.37  |
| Dytiscidae | <i>Hydroporus sinuatipes</i>      | 2.81 | 2.93  |
| Dytiscidae | <i>Hydroporus notabilis</i>       | 1.25 | 2.93  |
| Dytiscidae | <i>Hydroporus rufinasus</i>       | 0.46 | 5.13  |
| Dytiscidae | <i>Hydroporus striola</i>         | 0.31 | 11.59 |
| Dytiscidae | <i>Hydroporus tenebrosus</i>      | 1.54 | 5.38  |
| Dytiscidae | <i>Hygrotus</i> CHU2              | N/A  | 3.6   |
| Dytiscidae | <i>Hygrotus</i> CHU3              | 2.49 | 2.2   |
| Dytiscidae | <i>Hygrotus impressopunctatus</i> | 0.66 | 13.01 |
| Dytiscidae | <i>Hygrotus marklini</i>          | 1.55 | 2.2   |
| Dytiscidae | <i>Hygrotus novemlineatus</i>     |      |       |
| Dytiscidae | <i>hudsonicus</i>                 | N/A  | 11.08 |
| Dytiscidae | <i>Hygrotus novemlineatus</i>     | 0.81 | 3.6   |
| Dytiscidae | <i>Hygrotus picatus</i>           | 0.61 | 13.29 |
| Dytiscidae | <i>Hygrotus sayi</i>              | 0.8  | 15.45 |

|               |                                    |      |       |
|---------------|------------------------------------|------|-------|
| Dytiscidae    | <i>Hygrotus unguicularis</i>       | 1.11 | 7.66  |
| Dytiscidae    | <i>Ilybius</i> CHU1                | N/A  | 4.15  |
| Dytiscidae    | <i>Ilybius churchillensis</i>      | 1.29 | 9.03  |
| Dytiscidae    | <i>Ilybius</i> CHU3                | N/A  | 4.15  |
| Dytiscidae    | <i>Ilybius discedens</i>           | 0.76 | 9.03  |
| Dytiscidae    | <i>Ilybius erichsoni</i>           | 2.02 | 12.01 |
| Dytiscidae    | <i>Ilybius subaeneus</i>           | 4.08 | 11.4  |
| Dytiscidae    | <i>Laccophilus biguttatus</i>      | 0.17 | 11.1  |
| Dytiscidae    | <i>Nebrioporus macronychus</i>     | 0.37 | 11.79 |
| Dytiscidae    | <i>Neoscutoperus hornii</i>        | 0.3  | 14.3  |
| Dytiscidae    | <i>Oreodytes davisii</i>           | 0.31 | 13.55 |
| Dytiscidae    | <i>Rhantus gutticollis</i>         | 0.62 | 8.23  |
| Dytiscidae    | <i>Rhantus suturellus</i>          | 2.66 | 6.71  |
| Dytiscidae    | <i>Rhantus wallisi</i>             | 2.42 | 6.71  |
| Dytiscidae    | <i>Stictotarsus griseostriatus</i> | 1.11 | 12.52 |
| Elateridae    | <i>Ampedus</i> CHU1                | 0.48 | 12.84 |
| Elateridae    | <i>Ampedus pullus</i>              | N/A  | 13.86 |
| Elateridae    | <i>Ampedus quebecensis</i>         | N/A  | 12.84 |
| Elateridae    | <i>Ascoliocerus sanborni</i>       | 0.49 | 15.25 |
| Elateridae    | <i>Eanus decoratus</i>             | 0.35 | 17.59 |
| Elateridae    | <i>Hypnoidus bicolor</i>           | 0.34 | 12.83 |
| Elateridae    | <i>Hypnoidus impressicollis</i>    | 0    | 12.83 |
| Elateridae    | <i>Pseudanostirus ochreipennis</i> | N/A  | 16.49 |
| Elateridae    | <i>Sericus incongruus</i>          | 0.92 | 2.32  |
| Elateridae    | <i>Sericus incongruus</i> CHU2     | 0.15 | 2.32  |
| Elmidae       | <i>Optioservus fastiditus</i>      | N/A  | 17.99 |
| Gyrinidae     | <i>Gyrinus</i> CHU1                | 1.38 | 6.2   |
| Gyrinidae     | <i>Gyrinus aeratus</i>             | 0.17 | 3.31  |
| Gyrinidae     | <i>Gyrinus cavatus</i>             | 1.15 | 3.44  |
| Gyrinidae     | <i>Gyrinus dubius</i> CHU1         | 0.92 | 1.7   |
| Gyrinidae     | <i>Gyrinus dubius</i> CHU2         | 0.69 | 1.7   |
| Gyrinidae     | <i>Gyrinus minutus</i>             | N/A  | 3.44  |
| Gyrinidae     | <i>Gyrinus opacus</i>              | 0.81 | 3.31  |
| Gyrinidae     | <i>Gyrinus pectoralis</i>          | N/A  | 8.45  |
| Gyrinidae     | <i>Gyrinus wallisi</i>             | 0.49 | 4.77  |
| Haliplidae    | <i>Haliplus</i> CHU1               | N/A  | 10    |
| Haliplidae    | <i>Haliplus</i> CHU2               | N/A  | 7.95  |
| Haliplidae    | <i>Haliplus falli</i>              | 1.55 | 3.44  |
| Haliplidae    | <i>Haliplus immaculicollis</i>     | 1.55 | 7.92  |
| Haliplidae    | <i>Haliplus stagninus</i>          | 0.16 | 3.44  |
| Heteroceridae | <i>Explorator canadensis</i>       | 0.32 | 19.9  |
| Hydrophilidae | <i>Cercyon marinus</i>             | 0    | 15.06 |
| Hydrophilidae | <i>Enochrus hamiltoni</i>          | 1.86 | 15.5  |

|               |                                       |      |       |
|---------------|---------------------------------------|------|-------|
| Hydrophilidae | <i>Helophorus arcticus</i>            | 1.08 | 11.75 |
| Hydrophilidae | <i>Helophorus oblongus</i>            | 1.23 | 6.06  |
| Hydrophilidae | <i>Helophorus orientalis</i>          | N/A  | 6.06  |
| Hydrophilidae | <i>Hydrobius fuscipes</i> CHU1        | 1.08 | 5.88  |
| Hydrophilidae | <i>Hydrobius fuscipes</i> CHU2        | 1.47 | 5.88  |
| Hydrophilidae | <i>Laccobius</i> CHU1                 | 0.49 | 5.74  |
| Hydrophilidae | <i>Laccobius cinereus columbianus</i> | 0.62 | 5.74  |
| Lampyridae    | <i>Ellychnia corrusca</i>             | 2.65 | 18.38 |
| Latridiidae   | <i>Latridius</i> CHU1                 | 0.79 | 16.01 |
| Leiodidae     | <i>Agathidium</i> CHU1                | N/A  | 15.35 |
| Leiodidae     | <i>Catops luridipennis</i>            | 0.16 | 16.49 |
| Leiodidae     | <i>Leiodes longitarsus</i>            | 0.16 | 18.2  |
| Leiodidae     | LeiodidaeTW CHU2                      | N/A  | 15.35 |
| Leiodidae     | LeiodidaeTW CHU3                      | N/A  | 17.76 |
| Leiodidae     | LeiodidaeTW CHU5                      | 0.51 | 16.68 |
| Leiodidae     | LeiodidaeTW CHU6                      | N/A  | 16.68 |
| Leiodidae     | LeiodidaeTW CHU7                      | N/A  | 16.17 |
| Leiodidae     | LeiodidaeTW CHU8                      | 0.77 | 15.05 |
| Melyridae     | MelyridaeTW CHU1                      | 0.3  | 4.93  |
| Melyridae     | MelyridaeTW CHU2                      | 0.15 | 4.93  |
| Ptiliidae     | PtiliidaeTW CHU1                      | N/A  | 22.27 |
| Scarabaeidae  | <i>Aegialia lacustris</i>             | 0.46 | 16.73 |
| Scirtidae     | <i>Cyphon kongsbergensis</i>          | 0.17 | 16.82 |
| Scirtidae     | <i>Cyphon laevipennis</i>             | 0.77 | 17.55 |
| Scirtidae     | ScirtidaeTW CHU2                      | 1.26 | 17.98 |
| Scraptiidae   | ScraptiidaeTW CHU1                    | 0.32 | 16.84 |
| Silphidae     | <i>Nicrophorus vespilloides</i>       | N/A  | 17.57 |
| Silphidae     | <i>Thanatophilus lapponicus</i>       | 1.08 | 14.32 |
| Silphidae     | <i>Thanatophilus trituberculatus</i>  | 0.64 | 14.32 |
| Sphindidae    | SphindidaeTW CHU1                     | 0.35 | 15.74 |
| Staphylinidae | <i>Acidota quadrata</i>               | N/A  | 12.93 |
| Staphylinidae | <i>Aleochara sekanai</i>              | 0    | 12.42 |
| Staphylinidae | <i>Atheta</i> CHU1                    | 0.15 | 13.89 |
| Staphylinidae | <i>Atheta</i> CHU2                    | 0.16 | 12.07 |
| Staphylinidae | <i>Atheta</i> CHU3                    | N/A  | 12.07 |
| Staphylinidae | <i>Atheta</i> CHU4                    | 0    | 12.22 |
| Staphylinidae | <i>Atheta</i> CHU5                    | 0.16 | 14.03 |
| Staphylinidae | <i>Atheta</i> CHU6                    | N/A  | 14.41 |
| Staphylinidae | <i>Atheta</i> CHU7                    | N/A  | 15.67 |
| Staphylinidae | <i>Atheta</i> CHU8                    | 0    | 13.33 |
| Staphylinidae | <i>Atheta</i> CHU9                    | N/A  | 14.92 |
| Staphylinidae | <i>Bisnius hyperboreus alaskensis</i> | 0.73 | 17.8  |
| Staphylinidae | <i>Boreophilia</i> CHU1               | N/A  | 10.2  |

|                |                                |             |             |
|----------------|--------------------------------|-------------|-------------|
| Staphylinidae  | <i>Boreophilia</i> CHU2        | N/A         | 10.63       |
| Staphylinidae  | <i>Boreophilia</i> CHU3        | N/A         | 10.2        |
| Staphylinidae  | <i>Boreostiba</i> CHU1         | 0           | 12.74       |
| Staphylinidae  | <i>Carpelimus</i> CHU1         | N/A         | 17.84       |
| Staphylinidae  | <i>Devia prospera</i>          | N/A         | 12.91       |
| Staphylinidae  | <i>Euaesthetus</i> CHU1        | 0           | 12.79       |
| Staphylinidae  | <i>Eucnecosum</i> CHU1         | N/A         | 4.36        |
| Staphylinidae  | <i>Eucnecosum brachypterum</i> | 0           | 7.16        |
| Staphylinidae  | <i>Eucnecosum brunnescens</i>  | 1.46        | 4.36        |
| Staphylinidae  | <i>Gabrius</i> CHU1            | 0           | 16.77       |
| Staphylinidae  | <i>Ischnosoma splendidum</i>   | N/A         | 16.91       |
| Staphylinidae  | <i>Lordithon</i> CHU1          | 1.46        | 17.29       |
| Staphylinidae  | <i>Olophrum</i> CHU1           | 0.77        | 6.27        |
| Staphylinidae  | <i>Olophrum</i> CHU2           | 0           | 6.27        |
| Staphylinidae  | <i>Olophrum</i> CHU3           | 0.77        | 7.76        |
| Staphylinidae  | <i>Oxypoda</i> CHU1            | N/A         | 3.89        |
| Staphylinidae  | <i>Oxypoda</i> CHU2            | N/A         | 3.89        |
| Staphylinidae  | <i>Philonthus</i> CHU1         | N/A         | 9.45        |
| Staphylinidae  | <i>Philonthus</i> CHU2         | N/A         | 9.45        |
| Staphylinidae  | <i>Philonthus boreas</i> CHU1  | N/A         | 9.88        |
| Staphylinidae  | <i>Philonthus boreas</i> CHU2  | N/A         | 9.88        |
| Staphylinidae  | <i>Quedius brunnipennis</i>    | 0           | 14.18       |
| Staphylinidae  | <i>Quedius fellmanni</i>       | 0.15        | 15          |
| Staphylinidae  | <i>Quedius fulvicollis</i>     | N/A         | 17.32       |
| Staphylinidae  | StaphylinidaeTW CHU2           | N/A         | 13.02       |
| Staphylinidae  | StaphylinidaeTW CHU28          | N/A         | 16.81       |
| Staphylinidae  | StaphylinidaeTW CHU31          | N/A         | 17.17       |
| Staphylinidae  | StaphylinidaeTW CHU3           | 0           | 14.37       |
| Staphylinidae  | StaphylinidaeTW CHU33          | N/A         | 15.86       |
| Staphylinidae  | StaphylinidaeTW CHU8           | N/A         | 12.91       |
| Staphylinidae  | <i>Stenus</i> CHU1             | N/A         | 19.83       |
| Staphylinidae  | <i>Stenus</i> CHU2             | 0.15        | 18.8        |
| Staphylinidae  | <i>Stenus hyperboneus</i>      | 0.46        | 15.36       |
| Staphylinidae  | <i>Stenus niveus</i>           | 0           | 16.63       |
| Staphylinidae  | <i>Stenus tenuipes</i>         | N/A         | 16.12       |
| Staphylinidae  | <i>Stenus umbratilis</i>       | 0.15        | 15.36       |
| Staphylinidae  | <i>Tachinus</i> CHU1           | 0           | 13.36       |
| Staphylinidae  | <i>Tachyporus</i> CHU1         | 0.16        | 13.02       |
| <b>AVERAGE</b> |                                | <b>0.75</b> | <b>10.4</b> |

8  
9
