# Supplementary material for: The diversity and biogeography of the Coleoptera of Churchill: insights from DNA barcoding
Source: PubMed Central journal article supplement (PMC3819705; doi:10.1186/1472-6785-13-40), 2013-10-29
Supplement: 1472-6785-13-40-S5.pdf [file 1472-6785-13-40-S5.pdf]

**Additional File 5.** Summary of collection habitats for specimens with species determinations in the Churchill Coleoptera barcode library.

| Species                         | Collected Habitats in Churchill Region*                                                             |
|---------------------------------|-----------------------------------------------------------------------------------------------------|
| <b>Buprestidae</b>              |                                                                                                     |
| <i>Chrysobothris trinervia</i>  | Rocky seashore (1), spruce burn (1)                                                                 |
| <i>Melanophila fulvoguttata</i> | Town (1)                                                                                            |
| <i>Melanophila acuminata</i>    | Spruce forest (1)                                                                                   |
| <b>Byrrhidae</b>                |                                                                                                     |
| <i>Byrrhus concolor</i>         | Rocky seashore (2), tundra (2)                                                                      |
| <i>Byrrhus fasciatus</i>        | Tundra lakeshore (1), town (1)                                                                      |
| <i>Simplocaria metallica</i>    | Sandy seashore (2), forested lakeshore (2)                                                          |
| <b>Carabidae</b>                |                                                                                                     |
| <i>Agonum affine</i>            | Tundra lakeshore (1)                                                                                |
| <i>Agonum nigriceps</i>         | Spruce burn pond (1)                                                                                |
| <i>Agonum placidum</i>          | Tundra lakeshore (1)                                                                                |
| <i>Amara alpina</i>             | Tundra (7), riparian (4), rocky seashore (3), spruce burn (2), other (3)                            |
| <i>Amara glacialis</i>          | Sandy seashore (1)                                                                                  |
| <i>Amara hyperborea</i>         | Sandy seashore (2), tundra lakeshore (1)                                                            |
| <i>Amara pseudobrunnea</i>      | Tundra (1)                                                                                          |
| <i>Amara quenseli</i>           | Sandy seashore (11), tundra (7), town (4), riparian (3), forested lakeshore (3), rocky seashore (1) |
| <i>Amara sinuosa</i>            | Tundra (5), forested lakeshore (3)                                                                  |
| <i>Amara torrida</i>            | Town (2), sandy seashore (1), town (1)                                                              |
| <i>Bembidion carinula</i>       | Forested lakeshore (1), Churchill R. riparian (1)                                                   |
| <i>Bembidion hastii</i>         | Churchill R. riparian (2), tundra (2), sandy seashore (1)                                           |
| <i>Bembidion morulum</i>        | Riparian (1), rocky seashore (1)                                                                    |
| <i>Bembidion nigripes</i>       | Churchill R. riparian (3), town (1)                                                                 |
| <i>Bembidion sordidum</i>       | Churchill R. riparian (4), tundra (1)                                                               |
| <i>Bembidion transversale</i>   | Forested lakeshore (1)                                                                              |
| <i>Calathus ingratus</i>        | Churchill R. riparian (4), tundra (4), forested lakeshore (2), open wetland (1)                     |

|                                             |                                                                                        |
|---------------------------------------------|----------------------------------------------------------------------------------------|
| <i>Carabus chamissonis</i>                  | Tundra (6), krummholz (3), ditch (3), sandy seashore (1), open wetland (1)             |
| <i>Carabus maender</i>                      | Churchill R. riparian (5), rocky seashore (3), ditch (2), open wetland (1)             |
| <i>Carabus taedatus agassii</i>             | Sandy seashore (233), forested lakeshore (61), krummholz (61), tundra (48), other (47) |
| <i>Cicindela longilabris</i>                | Open sand (3)                                                                          |
| <i>Cymindis cribricollis</i>                | Forested lakeshore (2)                                                                 |
| <i>Cymindis unicolor</i>                    | Riparian (6), krummholz (5), tundra (3), bluff pond (1)                                |
| <i>Diacheila arctica</i>                    | Riparian (2)                                                                           |
| <i>Dicheirotichus cognatus</i>              | Spruce forest (1)                                                                      |
| <i>Dicheirotichus mannerheimii</i>          | Town (1)                                                                               |
| <i>Dyschiriodes integer</i>                 | Tundra (1)                                                                             |
| <i>Dyschirius hiemalis</i>                  | Rocky seashore (3), krummholz (2)                                                      |
| <i>Elaphrus americanus americanus</i>       | Churchill R. riparian (21), open wetland (2)                                           |
| <i>Elaphrus clairvillei</i>                 | Churchill R. riparian (1), tundra (1)                                                  |
| <i>Elaphrus lapponicus</i>                  | Open wetland (3), rocky seashore (2), riparian (1), tundra (1), open wetland (1)       |
| <i>Harpalus nigritarsis</i>                 | Tundra (3), tundra lakeshore (1)                                                       |
| <i>Loricera pilicornis</i>                  | Churchill R. riparian (1), tundra (1)                                                  |
| <i>Notiophilus aquaticus</i>                | Forested lakeshore (7), riparian (1), tundra (1)                                       |
| <i>Notiophilus borealis</i>                 | Tundra (4), sandy seashore (1), krummholz (1)                                          |
| <i>Patrobis foveocollis</i>                 | Churchill R. riparian (3)                                                              |
| <i>Patrobis stygicus</i>                    | Churchill R. riparian (1), rocky seashore (1), tundra (1)                              |
| <i>Pelophila borealis</i>                   | Churchill R. riparian (2)                                                              |
| <i>Platynus mannerheimii</i>                | Open wetland (2), tundra (1)                                                           |
| <i>Pterostichus adstrictus</i>              | Tundra (2)                                                                             |
| <i>Pterostichus brevicornis brevicornis</i> | Tundra (6), town (4), forested lakeshore (2), tundra lakeshore (2), other (2)          |
| <i>Pterostichus caribou</i>                 | Tundra (4), riparian (3), sandy seashore (3)                                           |
| <i>Pterostichus pinguedineus</i>            | Rocky seashore (3), sandy seashore (1), tundra (1)                                     |
| <i>Pterostichus punctatissimus</i>          | Tundra (10), open wetland (5), rocky seashore (3), tundra lakeshore (2), other (8)     |
| <i>Stereocerus haematopus</i>               | Krummholz (16), riparian (6), rocky seashore (3), forested lakeshore (3), other (3)    |
| <i>Trechus apicalis</i>                     | Churchill R. riparian (2)                                                              |

### **Cerambycidae**

|                                |                                                   |
|--------------------------------|---------------------------------------------------|
| <i>Acmaeops proteus</i>        | Spruce forest (1)                                 |
| <i>Arhopalus foveicollis</i>   | Forested lakeshore (2), Churchill R. riparian (1) |
| <i>Gnathacmaeops pratensis</i> | Open wetland (2), krummholz (1), spruce burn (1)  |
| <i>Monochamus scutellatus</i>  | Open wetland (1), riparian (1), tundra (1)        |
| <i>Xestoleptura tibialis</i>   | Spruce forest (1)                                 |

### **Chrysomelidae**

|                              |                                                                                                  |
|------------------------------|--------------------------------------------------------------------------------------------------|
| <i>Altica tombacina</i>      | Rocky seashore (48), spruce burn (46), tundra lakeshore (21), forested lakeshore (17), other (2) |
| <i>Bromius obscurus</i>      | Spruce burn (1)                                                                                  |
| <i>Galerucella nymphaeae</i> | Tundra (2)                                                                                       |
| <i>Gonioctena linnaeana</i>  | Willow thicket (17), bare ground (11), spruce burn (7), riparian (6), other (7)                  |

### **Coccinellidae**

|                                   |                                                                      |
|-----------------------------------|----------------------------------------------------------------------|
| <i>Adalia bipunctata</i>          | Spruce burn (11), rocky seashore (2), tundra (2), willow thicket (1) |
| <i>Anisosticta bitriangularis</i> | Rocky seashore (3), spruce burn (2), other (4)                       |
| <i>Calvia quatuordecimguttata</i> | Churchill R. riparian (1)                                            |
| <i>Coccinella septempunctata</i>  | Tundra (6), other (4)                                                |
| <i>Hippodamia convergens</i>      | Tundra (2), spruce burn (1)                                          |
| <i>Mulsantina hudsonica</i>       | Willow thicket (1)                                                   |

### **Cucujidae**

|                        |                 |
|------------------------|-----------------|
| <i>Pediacus fuscus</i> | Spruce burn (1) |
|------------------------|-----------------|

### **Curculionidae**

|                                |                                                                                |
|--------------------------------|--------------------------------------------------------------------------------|
| <i>Acalyptus carpini</i>       | Spruce burn (5), open wetland (4), tundra lakeshore (4), tundra (3), other (8) |
| <i>Anthonomus signatus</i>     | Forested lakeshore (1)                                                         |
| <i>Auletes epilobii</i>        | Spruce burn (1)                                                                |
| <i>Dendroctonus rufipennis</i> | Spruce burn (2)                                                                |
| <i>Elleschus ephippiatus</i>   | Tundra (4)                                                                     |
| <i>Euhrychiopsis lecontei</i>  | Churchill R. riparian (1), forested lakeshore (1)                              |

|                               |                    |
|-------------------------------|--------------------|
| <i>Hypera seriata</i>         | Rocky seashore (1) |
| <i>Lepyrus labradorensis</i>  | Town (1)           |
| <i>Lepyrus stefanssoni</i>    | Town (2)           |
| <i>Polygraphus rufipennis</i> | Spruce forest (2)  |

### **Dytiscidae**

|                                   |                                                                                                                          |
|-----------------------------------|--------------------------------------------------------------------------------------------------------------------------|
| <i>Acilius canaliculatus</i>      | Tundra pond (3), bluff pond (1)                                                                                          |
| <i>Agabus adpressus</i>           | Spruce burn pond (1)                                                                                                     |
| <i>Agabus ajax</i>                | Tundra pond (24), bluff pond (10), Churchill R. (6), river/stream (6), other (5)                                         |
| <i>Agabus antennatus</i>          | Tundra pond (15), Churchill R. (7), spruce burn pond (6), bluff pond (4), other (3)                                      |
| <i>Agabus arcticus</i>            | Churchill R. (21), tundra pond (11), river/stream (7), other (13)                                                        |
| <i>Agabus audeni</i>              | Tundra pond (5), Churchill R. (2), other (2)                                                                             |
| <i>Agabus bicolor</i>             | Bluff pond (8), other (2)                                                                                                |
| <i>Agabus bifarius</i>            | Bluff pond (1), spruce burn pond (1), tundra pond (1)                                                                    |
| <i>Agabus clavicornis</i>         | Bluff pond (5), Churchill R. (2), spruce burn pond (2)                                                                   |
| <i>Agabus colymbus</i>            | Bluff pond (23), tundra pond (5), Churchill R. (4)                                                                       |
| <i>Agabus infuscatus</i>          | Bluff pond (83), Churchill R. (4), tundra pond (3), other (3)                                                            |
| <i>Agabus seriatus</i>            | Spruce burn pond (1)                                                                                                     |
| <i>Agabus phaeopterus</i>         | Churchill R. (9), river/stream (5), tundra pond (3), other (5)                                                           |
| <i>Agabus thomsoni</i>            | River/stream (6), ditch (1), tundra pond (1)                                                                             |
| <i>Carrhydrus crassipes</i>       | Tundra pond (3), bluff pond (2), other (2)                                                                               |
| <i>Colymbetes dahuricus</i>       | Ditch (3), tundra pond (2)                                                                                               |
| <i>Colymbetes dolabratus</i>      | Bluff pond (82), tundra pond (45), river/stream (14), lake (8), spruce forest pond (8), spruce burn pond (7), other (16) |
| <i>Dytiscus alaskanus</i>         | Tundra pond (6), river/stream (2), bluff pond (1)                                                                        |
| <i>Dytiscus dauricus</i>          | Bluff pond (19), tundra pond (11), spruce burn pond (2), river/stream (2), other (2)                                     |
| <i>Graphoderus perplexus</i>      | Tundra pond (9), bluff pond (3), spruce forest pond (2), other (2)                                                       |
| <i>Hydrocolus rubyae</i>          | Tundra pond (3)                                                                                                          |
| <i>Hydroporus columbianus</i>     | Spruce forest pond (1), tundra pond (1)                                                                                  |
| <i>Hydroporus dentellus</i>       | Tundra pond (4), bluff pond (2), ditch (2), spruce burn pond (1)                                                         |
| <i>Hydroporus erythrocephalus</i> | Tundra pond (5), river/stream (3), Churchill R. (2), spruce burn pond (1)                                                |
| <i>Hydroporus fuscipennis</i>     | Tundra pond (3), bluff pond (1), town (1)                                                                                |

|                                    |                                                                                                  |
|------------------------------------|--------------------------------------------------------------------------------------------------|
| <i>Hydroporus larsoni</i>          | Tundra pond (2)                                                                                  |
| <i>Hydroporus morio</i>            | Bluff pond (97), tundra pond (4)                                                                 |
| <i>Hydroporus notabilis</i>        | Bluff pond (3), tundra pond (1)                                                                  |
| <i>Hydroporus rufinasus</i>        | Tundra pond (2), bluff pond (1)                                                                  |
| <i>Hydroporus sinuatifipes</i>     | Bluff pond (15), tundra pond (7), river/stream (2)                                               |
| <i>Hydroporus striola</i>          | Tundra pond (3), bluff pond (2), Churchill R. (1)                                                |
| <i>Hydroporus tenebrosus</i>       | Bluff pond (6), tundra lakeshore (2), river/stream (2), other (2)                                |
| <i>Hygrotus impressopunctatus</i>  | Bluff pond (2), tundra pond (1)                                                                  |
| <i>Hygrotus marklini</i>           | Bluff pond (7), tundra pond (5), spruce forest pond (3), river/stream (1)                        |
| <i>Hygrotus novemlineatus</i>      | Bluff pond (35), tundra pond (2)                                                                 |
| <i>Hygrotus picatus</i>            | Tundra pond (2), spruce forest pond (1), tundra pond (1), open wetland (1)                       |
| <i>Hygrotus sayi</i>               | Spruce burn pond (3), tundra pond (2), Churchill R. (1)                                          |
| <i>Hygrotus tumidiventrif</i>      | Tundra pond (4)                                                                                  |
| <i>Hygrotus unguicularis</i>       | Tundra pond (27), Churchill R. (10), Churchill R. riparian (9), bluff pond (7), other (4)        |
| <i>Ilybius discedens</i>           | Tundra pond (3), ditch (2), bluff pond (1)                                                       |
| <i>Ilybius erichsoni</i>           | Spruce forest pond (4), Churchill R. (4), bluff pond (3), tundra pond (2), ditch (1)             |
| <i>Ilybius subaeneus</i>           | Tundra pond (18), spruce forest pond (6), river/stream (6), Churchill R. riparian (5), other (9) |
| <i>Laccophilus biguttatus</i>      | Tundra pond (17), spruce forest pond (4), bluff pond (4)                                         |
| <i>Nebrioporus macronychus</i>     | Churchill R. (15), river/stream (5), Churchill R. riparian (2), tundra pond (2)                  |
| <i>Neoporus superioris</i>         | Tundra pond (1)                                                                                  |
| <i>Neoscutoperus hornii</i>        | Ditch (3), spruce burn (2)                                                                       |
| <i>Oreodytes davisii</i>           | Churchill R. (13), lake (4), river/stream (2), tundra pond (1)                                   |
| <i>Rhantus gutticollis</i>         | Bluff pond (4), krummholz (1)                                                                    |
| <i>Rhantus suturellus</i>          | Bluff pond (3), open wetland (1), spruce burn pond (1)                                           |
| <i>Rhantus wallisi</i>             | Tundra pond (19), bluff pond (16), spruce forest pond (4), spruce burn pond (3), other (5)       |
| <i>Stictotarsus griseostriatus</i> | Bluff pond (41), tundra pond (30), rocky seashore (8), tundra lakeshore (7), other (16)          |

### **Elateridae**

|                              |                                                                            |
|------------------------------|----------------------------------------------------------------------------|
| <i>Ampedus pullus</i>        | Spruce forest (1)                                                          |
| <i>Ampedus quebecensis</i>   | Tundra (1)                                                                 |
| <i>Ascoliocerus sanborni</i> | Town (7), rocky seashore (5), tundra (2), riparian (2), sandy seashore (1) |
| <i>Eanus decoratus</i>       | Spruce burn (3), forested lakeshore (2), riparian (2), spruce forest (1)   |

*Hypnoidus bicolor* Forested lakeshore (4), tundra (2), other (4)  
*Hypnoidus impressicollis* Rocky seashore (7), tundra (2), Churchill R. riparian (1)  
*Pseudanostirus ochreipennis* Spruce burn (1)  
*Sericus incongruus* Riparian (2), spruce burn (2), other (4)

### **Elmidae**

*Optioservus fastiditus* Churchill R. (1)

### **Gyrinidae**

*Gyrinus aeratus* Spruce forest pond (4), river/stream (2), spruce burn pond (1), lake (1)  
*Gyrinus cavatus* Tundra pond (38), bluff pond (7), open wetland (5), lake (4), other (6)  
*Gyrinus dubius* Churchill R. (2), spruce burn pond (2), bluff pond (1), tundra pond (1)  
*Gyrinus minutus* Tundra pond (1)  
*Gyrinus opacus* Bluff pond (6), tundra pond (5), lake (3), other (3)  
*Gyrinus pectoralis* Open wetland (1)  
*Gyrinus wallisi* Churchill R. (2), lake (1), tundra pond (1)

### **Haliplidae**

*Haliplus falli* Bluff pond (17), Churchill R. (6), ditch (4), river/stream (2), tundra pond (1)  
*Haliplus immaculicollis* Churchill R. (2), other (4)  
*Haliplus stagninus* Bluff pond (5), tundra pond (1)

### **Heteroceridae**

*Explorator canadensis* Town (3), Churchill R. riparian (2)

### **Hydrophilidae**

*Cercyon marinus* Churchill R. riparian (3), tundra (1), town (1)  
*Enochrus hamiltoni* Spruce burn pond (3), tundra pond (3), other (9)  
*Enochrus perplexus* Rocky seashore (1)  
*Helophorus arcticus* Sandy seashore (6), lake (6), bluff pond (2), Churchill R. riparian (1)  
*Helophorus oblongus* Tundra pond (4)  
*Helophorus orientalis* Bluff pond (1)

*Hydrobius fuscipes* Tundra pond (6), bluff pond (4), Churchill R. (2), other (4)  
*Laccobius cinereus* Tundra pond (15), bluff pond (5), spruce burn pond (2), river/stream (2)  
*columbianus*

### **Lampyridae**

*Ellychnia corrusca* Open wetland (4), spruce burn (3), other (6)

### **Leiodidae**

*Catops luridipennis* Spruce burn (2), tundra (2), other (2)  
*Leiodes longitarsus* Forested lakeshore (8)

### **Scarabaeidae**

*Aegialia lacustris* Churchill R. riparian (2), tundra (1)  
*Serica tristis* Forested lakeshore (1)

### **Scirtidae**

*Cyphon kongsbergensis* Tundra (3), open sand (1)  
*Cyphon laevipennis* Churchill R. riparian (10), tundra pond (5), other (9)

### **Silphidae**

*Nicrophorus vespilloides* Churchill R. riparian (1)  
*Thanatophilus lapponicus* Tundra (4), krummholz (1)  
*Thanatophilus* Churchill R. riparian (17), sandy seashore (6), rocky seashore (2), open sand (2), other (2)  
*trituberculatus*

### **Staphylinidae**

*Acidota quadrata* Tundra (1)  
*Aleochara sekanai* Churchill R. riparian (1), tundra (1)  
*Bisnius hyperboreus* Sandy seashore (16), rocky seashore (8), open sand (3)  
*alaskensis*  
*Devia prospera* Forested lakeshore (1)  
*Eucnecosum brachypterum* Rocky seashore (2), sandy seashore (1)  
*Eucnecosum brunnescens* Forested lakeshore (7), town (3), other (3)

|                              |                                                                             |
|------------------------------|-----------------------------------------------------------------------------|
| <i>Gnypeta sellmani</i>      | Tundra (2)                                                                  |
| <i>Ischnosoma splendidum</i> | Forested lakeshore (1)                                                      |
| <i>Philonthus boreas</i>     | Churchill R. riparian (1), town (1)                                         |
| <i>Quedius brunnipennis</i>  | Spruce forest (1), spruce burn (1)                                          |
| <i>Quedius fellmanni</i>     | Town (3), Churchill R. riparian (1), riparian (1), open wetland (1),        |
| <i>Quedius fulvicollis</i>   | Spruce forest (1)                                                           |
| <i>Stenus hyperboneus</i>    | Spruce forest (2)                                                           |
| <i>Stenus niveus</i>         | Tundra lakeshore (2), forested lakeshore (1), sandy lakeshore (1), town (1) |
| <i>Stenus tenuipes</i>       | Riparian (1)                                                                |
| <i>Stenus umbratilis</i>     | Open wetland (3), tundra lakeshore (2)                                      |

---

\* this study only; number of barcoded specimens in parentheses. "Town" refers to the Town of Churchill. For those with multiple collected habitats, habitats of single specimens indicated as "other"
